# Supplementary material for: NLRX1 inhibits the early stages of CNS inflammation and prevents the onset of spontaneous autoimmunity
Source: PLoS Biol. 2019 Sep 16;17(9):e3000451. doi: 10.1371/journal.pbio.3000451 (PMC6762215; doi:10.1371/journal.pbio.3000451)
Supplement: S4 Table — qPCR, quantitative polymerase chain reaction. (XLSX) [file pbio.3000451.s004.xlsx]

## Sheet: Sheet1
Mouse genes Primer Sequences
Nlrx1	F: 5′-CCT CTT TGA GCC AGA CGA AG-3′
	R: 5′-GCC CAG TCC AAC ATC ACT TT-3′
Inflammatory mediators
Tnfα	F: 5'-GGC ATG GAT CTC AAA GAC AAC C-3'
	R: 5-'CAG GTA TAT GGG CTC ATA CCA G-3'
Il-1b	F: 5'-CAT CCA GCT TCA AAT CTC GCA G-3'
	R: 5'-CAC ACA CCA GCA GGT TAT CAT C-3'
NOS2	F: 5'-CAT TGG AAG TGA AGC GTT TCG-3'
	R: 5'-CAG CTG GGC TGT ACA AAC CTT C-3'
Ifnα	F: 5'-ATT GGC TAG GCT CTG TGC TTT-3'
	R: 5'-AGG GCT CTC CAG ACT TCT GC-3'
Ifnb	F: 5'-TTG CCA TCC AAG AGA TGC TC-3'
	R: 5'-TCA GAA ACA CTG TCT GCT GG-3'
Ccr5	F: 5'-CGA AAA CAC ATG GTC AAA CG-3'
	R: 5'-GTT CTC CTG TGG ATC GGG TA-3'
Ccl20	F: 5'-AAG TCC ACT GGG ACA CAA ATC-3'
	R: 5'-CTC AGC CTA AGA GTC AAG AAG ATG-3'
T cells
Tbet	F: 5'-GCC AGG GAA CCG CTT ATA-3'
	R: 5'-CCT TGT TGT TGG TGA GCT TTA-3'
Rorc	F: 5'-ACG GCC CTG GTT CTC ATC A-3'
	R: 5'-CCA AAT TGT ATT GCA GAT GTT CAA C-3'
Foxp3	F: 5'-GAA AGC GGA TAC CAA ATG A-3'
	R: 5'-CTG TGA GGA CTA CCG AGC C-3'
CD44	F: 5'-TCG ATT TGA ATG TAA CCT GCC G-3'
	R: 5'-CAG TCC GGG AGA TAC TGT AGC-3'
CD25	F: 5’-CCA CAT TCA AAG CCC TCT CCT A-3’
	R: 5’-GTT TTC CCA CAC TTC ATC TTG C-3’
Ifng	F: 5’-TGA GCT CAT TGA ATG CTT GG-3’
	R: 5’-ACA GCA AGG CGA AAA AGG AT-3’
Astrocytes
Amigo2	F: 5′-GAG GCG ACC ATA ATG TCG TT-3′
	R: 5′-GCA TCC AAC AGT CCG ATT CT-3′
C3	F: 5′-CAC CGC CAA GAA TCG CTA C-3'
	R: 5′-GAT CAG GTG TTT CAG CCG C-3'
Gbp2	F: 5′-GGG GTC ACT GTC TGA CCA CT-3′
	R: 5′-GGG AAA CCT GGG ATG AGA TT-3′
Ligp1	F: 5′-GGG GCA ATA GCT CAT TGG TA-3′
	R: 5′-ACC TCG AAG ACA TCC CCT TT-3′
Fbln5	F: 5′-CTT CAG ATG CAA GCA ACA A-3′
	R: 5′-AGG CAG TGT CAG AGG CCT TA-3′
Ggta	F: 5′-GTG AAC AGC ATG AGG GGT TT-3′
	R: 5′-GTT TTG TTG CCT CTG GGT GT-3′
S100a10	F: 5′-CCT CTG GCT GTG GAC AAA AT-3′
	R: 5′-CTG CTC ACA AGA AGC AGT GG-3′
Ptx3	F: 5′-AAC AAG CTC TGT TGC CCA TT-3′
	R: 5′-TCC CAA ATG GAA CAT TGG AT-3′
Clcf1	F: 5′-CTT CAA TCC TCC TCG ACT GG-3′
	R: 5′-TAC GTC GGA GTT CAG CTG TG-3′
Slc10	F: 5′-GCT TCG GTG GTA TGA TGC TT-3′
	R: 5′-CCA CAG GCT TTT CTG GTG AT-3′
Gfap	F: 5′-TCC TGG AAC AGC AAA ACA AG-3'
	R: 5′-CAG CCT CAG GTT GGT TTC AT-3'
Hsbp1	F: 5′-GAG ATC ACT GGC AAG CAC GA-3'
	R: 5′-ATT GTG TGA CTG CTT TGG GC-3'
Steap4	F: 5′-CAA ACG CCG AGT ACC TTG CT-3'
	R: 5′-CAG ACA AAC ACC TGC CGA CT-3'
Timp1	F: 5′- CGC TAG AGC AGA TAC CAC GA-3'
	R: 5′- CCA GGT CCG AGT TGC AGA AA-3'
Housekeeping gene
18S	F: 5′-CGG CTA CCA CAT CCA AGG AA-3′
	R: 5′-GCT GGA ATT ACC GCG GCT-3′.
Human genes
NLRX1	F: 5'-CCT CTG CTC TTC AAC CTG ATC-3'
	R: 5'-CCT CTC GAA ACA TCT CCA GC-3'
TNFα	F: 5'-ACT TTG GAG TGA TCG GCC-3'
	R: 5'-GCT TGA GGG TTT GCT ACA AC-3'
GAPDH	F: 5'-GAT TCC ACC CAT GGC AAA TTC-3'
	R: 5'-AGC ATC GCC CCA CTT GAT T-3'
